# Supplementary material for: Mutational and non mutational adaptation of Salmonella enterica to the gall bladder
Source: PubMed Central journal article supplement (PMC6435676; doi:10.1038/s41598-019-41600-8), 2019-03-26
Supplement: 41598_2019_41600_MOESM1_ESM.pdf [file 41598_2019_41600_MOESM1_ESM.pdf]

Mutational and non mutational adaptation of *Salmonella*  
*enterica* to the gall bladder

Verónica Urdaneta, Sara B. Hernández and Josep Casadesús

**SUPPLEMENTARY INFORMATION**

**Table S1.** Oligonucleotides used in this study

| <b>Oligonucleotide name</b> | <b>Sequence (5' → 3')</b> |
|-----------------------------|---------------------------|
| rlpB-E1                     | CAATGGTGGAAAACACCACG      |
| rlpB-E2                     | GGATCGAGAGTAAAAGCGTG      |
| pbgA-E1                     | GAAAAACATAAGGCGCCGAC      |
| pbgA -E2                    | AGCCGTAACAGGCTGGTTC       |
| dipZ-E1                     | ACATCGCTGTACTACTGG        |
| dipZ-E2                     | TGGCCAGAAACGCTGTAATG      |
| ftsQ-E1                     | CAGGCATGGAAAGCTTTAGG      |
| ftsQ-E2                     | GAACGCATTTCACTACTGA       |
| STnc400STM3845-E1           | GAGATGCTTCAGTCTTGG        |
| STnc400STM3845-E2           | GGATGAGCAATGGTTCTC        |
| dam-A                       | CAATTGCCTGTGAGTGTCG       |
| dam-B                       | CAGCCGACAGAATTG           |
| ftsK-E1                     | ACGTAGTGATGGAAGAGG        |
| ftsK-E2(internal)           | ATTGCGGATGCGGCTGATAC      |
| STM1268-E1                  | TGCTGCTGCGATTGCAATAG      |
| STM1268-E2                  | ACATGCGTTCATTGAGCG        |
| ygcF-E1                     | GTAATGGATGAGTCACAGACG     |
| ygcF-E2                     | GAAGCTCTGGGCGAAAAAGC      |
| 3216501-E1                  | CCTTTCTGGATATAACAACG      |
| 3217010-E2                  | GAAGCTCTGGGCGAAAAAGC      |
| yhbG-E1                     | TGACCGGCAACGCTTATCTG      |
| yhbG-E2                     | ATCGGTTTGCTCAAGCAG        |
| 2728222-E1                  | AGAGCAGCCCTATTGGAGT       |
| 2729110-E2                  | CCTCCTAAGGAAAACCACAAG     |
| yifK-E1                     | TCTGATGACTTGAGCAGC        |
| yifK-E2                     | AACCCACAGTCCGTAAGGAC      |
| Glmz-E2                     | GGACGCGTATGATTATGCCTG     |
